# Supplementary material for: The impact of shell host (NaYF4/CaF2) and shell deposition methods on the up-conversion enhancement in Tb3+, Yb3+codoped colloidal α-NaYF4core–shell nanoparticles
Source: Royal Society of Chemistry journal article supplement (doi:10.1039/c3nr05412h), 2013-11-26
Supplement: c3nr05412h.pdf [file c3nr05412h.pdf]

## Electronic Supplementary Information

### **The impact of shell host (NaYF<sub>4</sub>/CaF<sub>2</sub>) and shell deposition method on the up-conversion enhancement in Tb<sup>3+</sup>, Yb<sup>3+</sup> codoped colloidal α-NaYF<sub>4</sub> core-shell nanoparticles**

Katarzyna Prorok<sup>a</sup>, Artur Bednarkiewicz<sup>ab\*</sup>, Bartłomiej Cichy<sup>a</sup> Anna Gnach<sup>ac</sup>,  
Małgorzata Misiak,<sup>ab</sup> Marcin Sobczyk<sup>d</sup>, Wiesław Strek<sup>c</sup>,

<sup>a</sup> *Wrocław Research Centre EIT+, Stabłowicka 147, 54-066 Wrocław, Poland*

<sup>b</sup> *Polish Academy of Sciences, Institute of Low Temperature and Structure Research,  
Okolna 2, 50-422 Wrocław, Poland*

<sup>c</sup> *Polish Academy of Sciences, Institute of Immunology and Experimental Therapy,  
R. Weigla 12, 53-114 Wrocław, Poland*

<sup>d</sup> *University of Wrocław, Faculty of Chemistry, F. Joliot-Curie 14, 50-383 Wrocław, Poland*

\*Corresponding authors:

Artur Bednarkiewicz, Ph.D.

*Institute of Low Temperature and Structure Research, PAS, ul. Okolna 2, 50-422 Wrocław, Poland*

E-mail: A.Bednarkiewicz@int.pan.wroc.pl

Phone: +48-71-3954-166

Fax: +48-71-344-10-29

Table S1. A list of all the synthesized samples as well as the type of synthesis and concentration of the shell.

| shell             | synthesis method | shell:core molar ratio |          |          |          |
|-------------------|------------------|------------------------|----------|----------|----------|
|                   |                  | 1 layer                | 2 layers | 3 layers | 4 layers |
| NaYF <sub>4</sub> | shell by shell   | 0.2                    | 0.5      | 0.8      | 1.0      |
|                   |                  | 1.2                    | 1.5      | 1.8      | 2.0      |
|                   |                  | 2.2                    | 2.5      | 2.8      | 3.0      |
| CaF <sub>2</sub>  | one step coating | 1.0                    |          |          |          |
|                   |                  | 1.5                    |          |          |          |
|                   |                  | 2                      |          |          |          |
|                   |                  | 3                      |          |          |          |

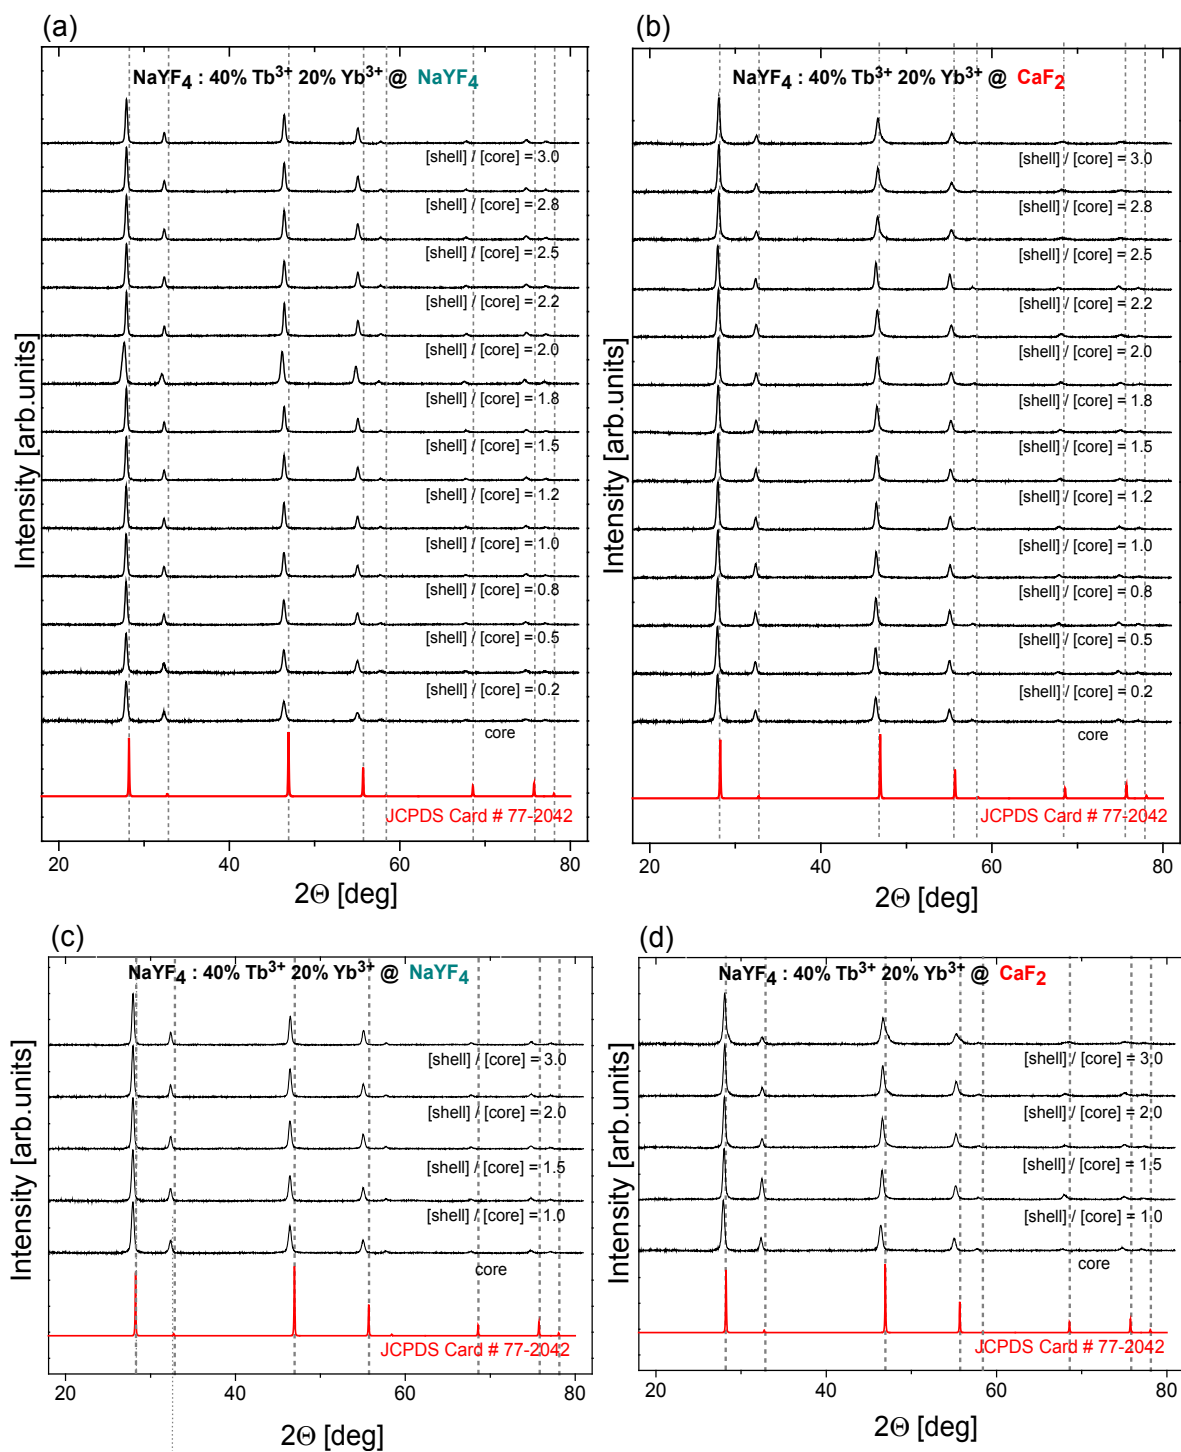

Fig. S1 XRD pattern of cubic NaYF<sub>4</sub>: 40% Tb<sup>3+</sup>, 20% Yb<sup>3+</sup> core nanocrystals and the corresponding core coated with NaYF<sub>4</sub> (a, c) and CaF<sub>2</sub> (b, d) shell with different shell:core molar ratio for samples obtained by shell by shell (a, b) and one step coating method (c, d).

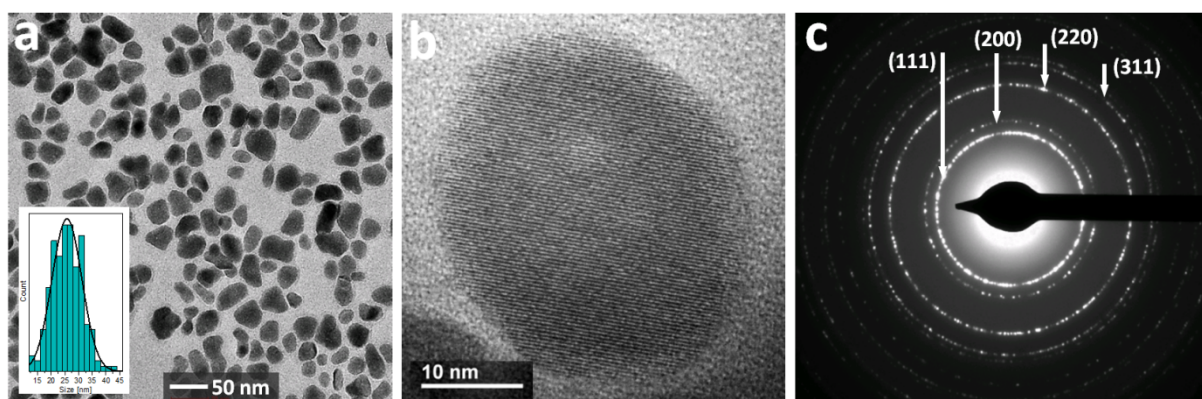

Fig. S2 (a) TEM images of  $\text{NaYF}_4:40\%\text{Tb}^{3+}, 20\%\text{Yb}^{3+}$  core nanoparticles; (b) HRTEM image of a single crystallite. Inset in (a) displays a histogram of the size distribution; (c) SEAD pattern of the  $\text{NaYF}_4:40\%\text{Tb}^{3+}, 20\%\text{Yb}^{3+}$  nanoparticles.

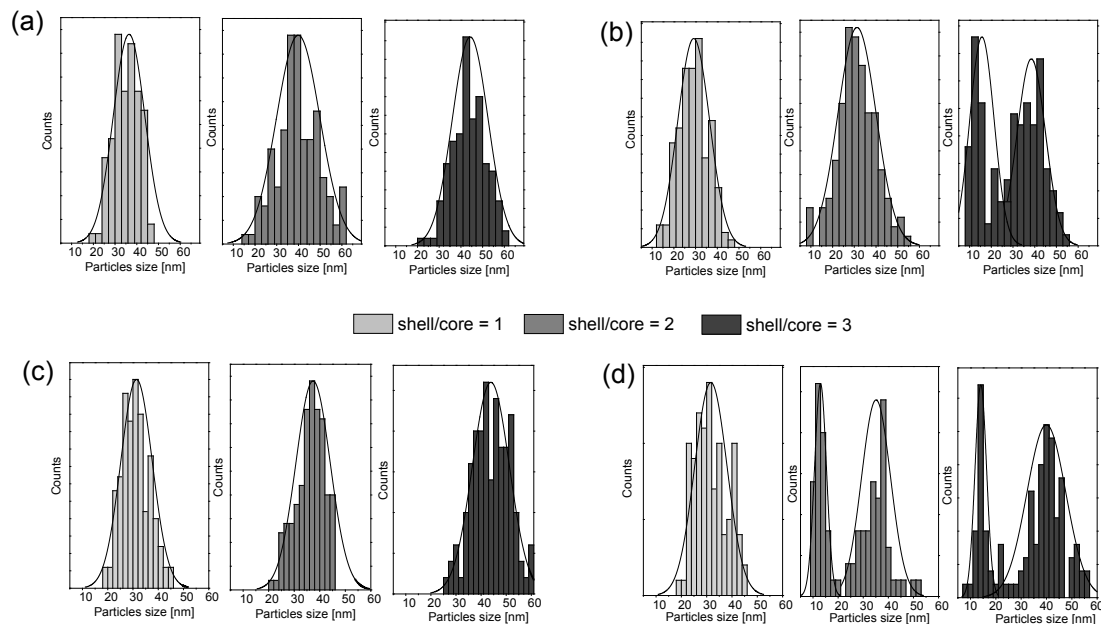

Fig. S3 Size distribution of  $\text{NaYF}_4:40\%\text{Tb}^{3+}, 20\%\text{Yb}^{3+}$  core coated with  $\text{NaYF}_4$  (a, b) and  $\text{CaF}_2$  (c, d) shell with different shell:core molar ratio. The core/shell nanoparticles were obtained by shell by shell (a, c) and one step coating (b, d) method.

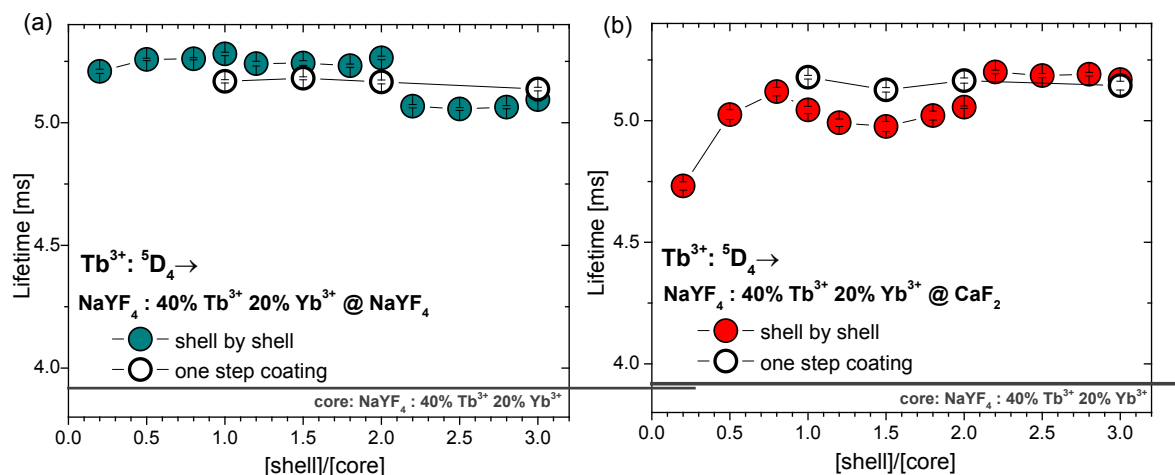

Fig. S4 Dependence of luminescence lifetimes of  $\text{Tb}^{3+}$  versus shell:core molar ratio for both  $\text{NaYF}_4$  (a) and  $\text{CaF}_2$  (b) shells. Shell by shell (filled circles) and one step (open circles) coating samples was compared. The  ${}^5\text{D}_4$  terbium ions level was excited either through the cooperative energy transfer from ytterbium ions (under 976 nm).

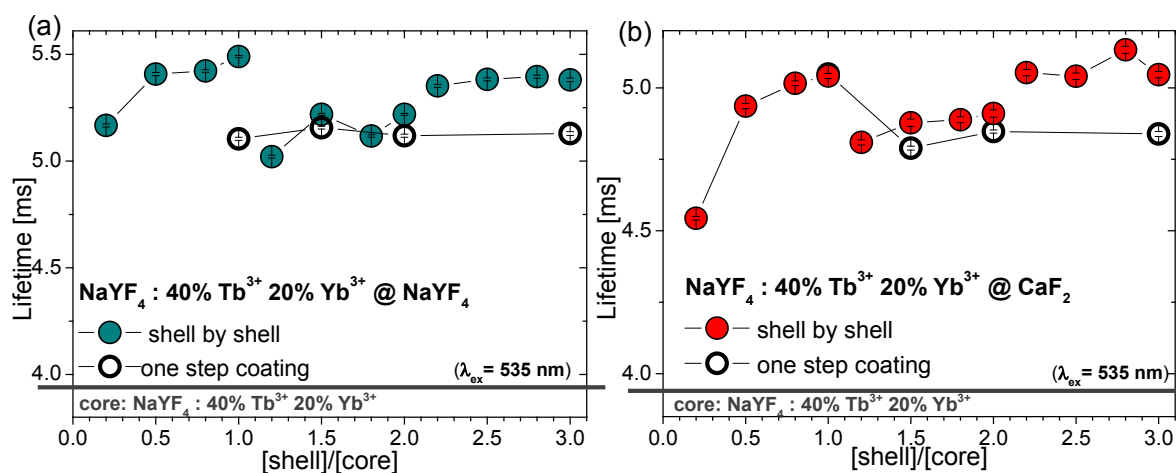

Fig. S5 Dependence of luminescence lifetimes of  $\text{Tb}^{3+}$  versus shell:core molar ratio for both  $\text{NaYF}_4$  (a) and  $\text{CaF}_2$  (b) shells. Shell by shell (filled circles) and one step (open circles) coating samples was compared. The  ${}^5\text{D}_4$  terbium ions level was excited by direct excitation of terbium ions (under 532 nm).

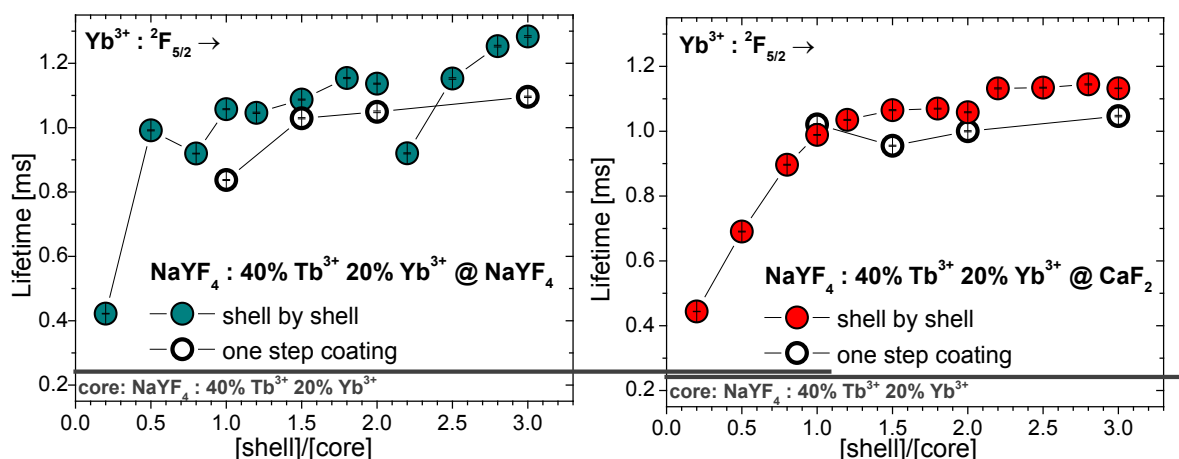

Fig. S6 Dependence of luminescence lifetimes of Yb<sup>3+</sup>: <sup>2</sup>F<sub>5/2</sub> versus shell:core molar ratio for both NaYF<sub>4</sub> (a) and CaF<sub>2</sub> (b) shells. Shell by shell (filled circles) and one step (open circles) coating samples was compared.

Table S2 contains intentional and experimental relative concentrations found from spectra deconvolution of 27 mixtures of three different (Yb<sup>3+</sup>/Er<sup>3+</sup>, Yb<sup>3+</sup>/Tm<sup>3+</sup>, and Yb<sup>3+</sup>/Tb<sup>3+</sup>) luminophores. Although the same experimental conditions (e.g. excitation geometry, power density etc.) were used along all the measurements, the corresponding numbers in both columns (intentional vs. experimental) cannot be directly compared. This is because no absolute NPs concentrations per unit volume was known or these chloroform dispersed colloidal solutions of NPs were drying in slightly different way forming layers of different thickness. However, the samples of the same composition, e.g. [w<sub>Er</sub>, w<sub>Tb</sub>, w<sub>Tm</sub>] = [1,1,1] = [3,3,3] = [5,5,5] = [33%,33%,33%] (where 1, 3 and 5 describe relative unit volumes of Er<sup>3+</sup>, Tb<sup>3+</sup> and Tm<sup>3+</sup> colloidal solutions used to form a mixture) led to very similar experimental weights, here [w<sub>Er</sub>, w<sub>Tb</sub>, w<sub>Tm</sub>] = [55,19,26] % = [54,20,26] % = [53, 20, 27] %. This confirms reliability of data deconvolution and capability to distinguish numerous spectral fingerprints. Number of possible spectral fingerprints is much higher, since both concentration variability *C* may increase (here *C*=5 concentration levels, which may rise to e.g. *C*=10 levels) and more possible taggants *T* may

be used (beside  $\text{Yb}^{3+}/\text{Tm}^{3+}$ ,  $\text{Yb}^{3+}/\text{Tb}^{3+}$  and  $\text{Yb}^{3+}/\text{Er}^{3+}$  also  $\text{Yb}^{3+}/\text{Dy}^{3+}$  and  $\text{Yb}^{3+}/\text{Ho}^{3+}$  thus  $T=5$ ).

Therefore, the number of possible spectral coed rises to  $N = C^T = 10^5$ .

Table S2. Intentional and experimental relative concentrations found from spectra deconvolution of 27 mixtures of three different ( $\text{Yb}^{3+}/\text{Er}^{3+}$ ,  $\text{Yb}^{3+}/\text{Tm}^{3+}$ , and  $\text{Yb}^{3+}/\text{Tb}^{3+}$ ) luminophores.

| Sample number | Intentional relative concentrations [%] |      |      | Experimental relative concentrations [%] |      |      |
|---------------|-----------------------------------------|------|------|------------------------------------------|------|------|
|               | [Er]                                    | [Tm] | [Tb] | [Er]                                     | [Tm] | [Tb] |
| 1             | 33                                      | 33   | 33   | 55                                       | 19   | 26   |
| 2             | 20                                      | 20   | 60   | 40                                       | 31   | 29   |
| 3             | 14                                      | 14   | 71   | 32                                       | 49   | 19   |
| 4             | 20                                      | 60   | 20   | 48                                       | 18   | 34   |
| 5             | 14                                      | 43   | 43   | 38                                       | 27   | 35   |
| 6             | 11                                      | 33   | 56   | 32                                       | 36   | 32   |
| 7             | 14                                      | 71   | 14   | 36                                       | 11   | 53   |
| 8             | 11                                      | 56   | 33   | 30                                       | 24   | 47   |
| 9             | 9                                       | 45   | 45   | 25                                       | 31   | 44   |
| 10            | 60                                      | 20   | 20   | 67                                       | 14   | 19   |
| 11            | 43                                      | 14   | 43   | 64                                       | 22   | 15   |
| 12            | 33                                      | 11   | 56   | 56                                       | 31   | 13   |
| 13            | 43                                      | 43   | 14   | 55                                       | 12   | 33   |
| 14            | 33                                      | 33   | 33   | 54                                       | 20   | 26   |
| 15            | 27                                      | 27   | 45   | 50                                       | 27   | 23   |
| 16            | 33                                      | 56   | 11   | 51                                       | 10   | 38   |
| 17            | 27                                      | 45   | 27   | 48                                       | 17   | 35   |
| 18            | 23                                      | 38   | 38   | 42                                       | 25   | 33   |
| 19            | 71                                      | 14   | 14   | 77                                       | 12   | 11   |
| 20            | 56                                      | 11   | 33   | 70                                       | 18   | 11   |
| 21            | 45                                      | 9    | 45   | 66                                       | 24   | 10   |
| 22            | 56                                      | 33   | 11   | 67                                       | 10   | 22   |
| 23            | 45                                      | 27   | 27   | 65                                       | 15   | 20   |
| 24            | 38                                      | 23   | 38   | 58                                       | 23   | 20   |
| 25            | 45                                      | 45   | 9    | 62                                       | 9    | 30   |
| 26            | 38                                      | 38   | 23   | 57                                       | 14   | 29   |
| 27            | 33                                      | 33   | 33   | 53                                       | 20   | 27   |
